# Supplementary material for: The Lived Experiences of Federal Agency Information-Technology Employees in Times of Outsourcing.
Source: MDPI journal article supplement (doi:10.3390/molecules28031322), 2010-01-01
Supplement: s1 [file s1]

# Comparisons of optimization of mixed strain fermentation conditions of dietary fiber from soybean residue and the effect on structure, properties and potential biological activity of dietary fiber from soybean residue

## Supplementary methods

### Determination of antioxidant capacity

Determination of inhibition ability of superoxide anion. Simply put, 0.15 mg/mL of vitamin C solution (0.05 mL), water (0.05 mL) and sample (0.05 mL) were mixed with superoxide anion solution (1.3 mL), respectively, and then in a constant temperature water bath of 37 °C for 40 min. After adding color developing agent (2 mL), the mixture was mixed and left for 10 min at room temperature. The absorbance was read at 550 nm. The calculation formula is as follows:

$$\text{Superoxide anion inhibition ability (U/gprot)} = (A_{\text{control}} - A_{\text{sample}}) / (A_{\text{control}} - A_{\text{standard}}) * 150 / C_{\text{pr}} \quad (7)$$

among  $A_{\text{sample}}$  represents the absorbance of the sample;  $A_{\text{control}}$  represents the absorbance of water;  $A_{\text{standard}}$  represents the absorbance of 0.15 mg/mL vitamin C solution;  $C_{\text{pr}}$  represents the protein concentration of the sample.

Determination of inhibition ability of hydroxy free radical [49]. To put it simply, 0.03%  $\text{H}_2\text{O}_2$  (0.2 mL), water (0.4 mL), water (0.2 mL) and sample (0.2 mL) were mixed with hydroxyl radical solution (0.4 mL), respectively, at 37 °C, reaction for 1 min, immediately added color developing agent (2 mL) and mixed, at room temperature for 20 min. The absorbance was read at 550 nm. The calculation formula is as follows:

$$\text{Hydroxyl free radical inhibition ability (U/mgprot)} = (A_{\text{control}} - A_{\text{sample}}) / (A_{\text{standard}} - A_{\text{black}}) * 44.12 / C_{\text{pr}} \quad (8)$$

among  $A_{\text{sample}}$  represents the absorbance of the sample;  $A_{\text{control}}$  represents the absorbance of water (0.2 mL);  $A_{\text{standard}}$  represents the absorbance of 0.03%  $\text{H}_2\text{O}_2$ ;  $A_{\text{black}}$  represents the absorbance of water (0.4 mL);  $C_{\text{pr}}$  represents the protein concentration of the sample.

Determination of DPPH free radical scavenging ability [50]. In simple terms, the sample (0.1 g) was mixed with 80% methanol solution (1 mL), homogenized in ice water bath, centrifuged at 12000 rpm for 10 min, and the supernatant was collected. The supernatant (400  $\mu\text{L}$ ) was mixed with DPPH radical solution (600  $\mu\text{L}$ ). The supernatant (400  $\mu\text{L}$ ) was taken from each sample and mixed with 80% methanol (600  $\mu\text{L}$ ). The 80% methanol (400  $\mu\text{L}$ ) was mixed with DPPH radical solution (600  $\mu\text{L}$ ). Room temperature dark for 30 min. Centrifuge at 4000 rpm for 5 min and collect supernatant. The absorbance was read at 517 nm. The calculation formula is as follows:

$$\text{DPPH free radical scavenging activity } (\mu\text{g/g}) = ((1 - (A_{\text{supernatant}} - A_{\text{control}}) / A_{\text{black}}) - 0.0094) / 0.032 \quad (9)$$

among  $A_{\text{supernatant}}$  represents the absorbance of the sample after mixing with DPPH radical solution;  $A_{\text{control}}$  represents the absorbance of the sample after mixing with 80% methanol;  $A_{\text{black}}$  represents the absorbance of 80% methanol after mixing treatment with DPPH radical solution.

Determination of total antioxidant capacity. Simply put, the sample (0.01 mL) was mixed with ABTS solution (0.19 mL) at room temperature for 6 min. The absorbance was read at 405 nm. The calculation formula is as follows:

$$\text{Total antioxidant capacity (mmol/g)} = (0.1524 \times A_{\text{sample}} + 0.4451) / \text{Cpr} \quad (10)$$

among  $A_{\text{sample}}$  represents the absorbance of the sample; Cpr represents the protein concentration of the sample.

Determination of reducing power of iron ions [50]. In simple terms, the sample (0.1g) was mixed with 80% ethanol solution (1 mL) and homogenized. Then, the supernatant was extracted by ultrasonic extraction for 30 min at 60 °C and 200-300 W, and centrifuged at 12000 rpm for 10 min. Supernatant (0.005 mL), water (0.025 mL) and color developing solution (0.17 mL) were blended. At the same time, water (0.03 mL) and color developing solution (0.17 mL) were mixed. At room temperature for 10 min, the absorbance was read at 590 nm. The calculation formula is as follows:

$$\text{Reducing power of iron (}\mu\text{mol/g)} = 3.12 \times (A_{\text{sample}} - A_{\text{black}} + 0.0165) / \text{Cpr} \quad (11)$$

among  $A_{\text{sample}}$  represents the absorbance of the sample;  $A_{\text{black}}$  represents the absorbance of water; Cpr represents the protein concentration of the sample.

## References

49. Tang, C., Wang, Y., Long, Y., An, X., Shen, J., Ni, Y. Anchoring 20 (R)-ginsenoside Rg3 onto cellulose nanocrystals to increase the hydroxyl radical scavenging activity. *ACS SUSTAIN CHEM ENG.* **2017**, 5(9), 7507-7513. <https://doi.org/10.1021/acssuschemeng.6b02996>
50. Cong-Cong, Q., Fan-Kun, Z., Na-Na, W., Bin, T. Functional, physicochemical and structural properties of soluble dietary fiber from rice bran with extrusion cooking treatment. *Food Hydrocolloids.* **2021**, 121, 107057. <https://doi.org/10.1016/j.foodhyd.2021.107057>
